# Supplementary material for: Emergence of colistin resistance and characterization of antimicrobial resistance and virulence factors of Aeromonas hydrophila, Salmonella spp., and Vibrio cholerae isolated from hybrid red tilapia cage culture
Source: PeerJ. 2023 Feb 23;11:e14896. doi: 10.7717/peerj.14896 (PMC9968459; doi:10.7717/peerj.14896)
Supplement: Supplemental Information 1 [file peerj-11-14896-s001.xlsx]

## Sheet: Salmonella
ID	Collected date	Pdate	Sample	Farm	Sampling	Code	Sal	Lot	Sample	IDS	AMP	CHC	CIP	STP	SUL	TET	ENRO	GEN	OTC	OXO	TRI	FLOR		TEM	Sul1	Sul2	Sul3	int1	int2	int3	CTX-M	qnrA	qnrB	qnrS	ermB	SHV	dfrA1	dfrA12	catA	catB	cmlA	strA	strB	tetD	SXT	aac(3)IV	adda1	tetA	tetB
1	2019-10-01	2019-10-01	0	0	II	W01	1	4	W1.1	1	1	1	0	0	0	1	0	0	1	1	0	1		1	0	0	0	0	0	0	0	0	0	1	0	0	0	0	0	0	0	0	0	0	0	0	0	1	0
3	2019-10-01	2019-10-01	0	0	II	W03	1	4	W3.1	2	1	1	0	0	0	1	0	0	1	1	0	1		1	0	0	0	0	0	0	0	0	0	1	0	0	0	0	0	0	0	0	0	0	0	0	0	1	0
4	2019-10-01	2019-10-01	0	0	II	W03	1	4	W3.2	3	1	1	0	0	0	1	0	0	1	1	0	1		1	0	0	0	0	0	0	0	0	0	1	0	0	0	0	0	0	0	0	0	0	0	0	0	1	0
12	2019-10-01	2019-10-01	0	2	II	W11	1	4	W11.1	4	1	1	0	0	0	1	0	0	1	1	0	1		1	0	0	0	0	0	0	0	0	0	1	0	0	0	0	0	0	0	0	0	0	0	0	0	1	0
13	2019-10-01	2019-10-01	0	2	II	W11	1	4	W11.3	5	1	1	0	0	0	0	0	0	0	0	0	1		1	0	0	0	0	0	0	0	0	0	0	0	0	0	0	0	0	0	0	0	0	0	0	0	0	0
14	2019-10-01	2019-10-01	0	2	II	W12	1	4	W12.1	6	1	1	0	0	0	1	0	0	1	1	0	1		1	0	0	0	0	0	0	0	0	0	1	0	0	0	0	0	0	0	0	0	0	0	0	0	1	0
15	2019-10-01	2019-10-01	0	2	II	W13	1	4	W13.1	7	1	1	0	0	0	1	0	0	1	1	0	1		1	0	0	0	0	0	0	0	0	0	1	0	0	0	0	0	0	0	0	0	0	0	0	0	1	0
17	2019-10-01	2019-10-01	0	2	II	W15	1	4	W15.1	8	1	1	0	0	0	1	0	0	1	1	0	1		1	0	0	0	0	0	0	0	0	0	1	0	0	0	0	0	0	0	0	0	0	0	0	0	1	0
46	2019-10-01	2019-10-02	2	2	II	F14I	1	4	I14..1	9	1	1	0	0	0	1	0	0	1	1	0	1	6	1	0	0	0	0	0	0	0	0	0	1	0	0	0	0	0	0	0	0	0	0	0	0	0	1	0
78	2019-12-02	2/12/2019	0	0	III	W01	1	1	W1.1	1	1	1	0	0	0	0	0	0	0	0	0	1		1	0	0	0	0	0	0	0	0	0	0	0	0	0	0	0	0	0	0	0	0	0	0	0	0	0
79	2019-12-02	2/12/2019	0	0	III	W02	1	1	W2.1	2	1	1	0	0	0	1	0	0	1	1	0	1		1	0	0	0	0	0	0	0	0	0	1	0	0	0	0	0	0	0	0	0	0	0	0	0	1	0
80	2019-12-02	2/12/2019	0	0	III	W03	1	1	W3.1	3	1	1	0	0	0	0	0	0	0	0	0	1		1	0	0	0	0	0	0	0	0	0	0	0	0	0	0	0	0	0	0	0	0	0	0	0	0	0
81	2019-12-02	2/12/2019	0	0	III	W04	1	1	W4.1	4	1	1	0	0	0	1	0	0	1	1	0	1		1	0	0	0	0	0	0	0	0	0	1	0	0	0	0	0	0	0	0	0	0	0	0	0	1	0
82	2019-12-02	2/12/2019	0	0	III	W05	1	1	W5.1	5	1	0	1	0	0	1	0	0	1	1	0	0		1	0	0	0	0	0	0	0	0	0	1	0	0	0	0	0	0	0	0	0	0	0	0	0	1	0
83	2019-12-02	2/12/2019	0	1	III	W06	1	1	W6.1	6	1	1	0	0	0	1	0	0	1	1	0	1		1	0	0	0	0	0	0	0	0	0	1	0	0	0	0	0	0	0	0	0	0	0	0	0	1	0
84	2019-12-02	2/12/2019	0	1	III	W07	1	1	W7.1	7	1	1	0	0	0	0	0	0	0	0	0	1		1	0	0	0	0	0	0	0	0	0	0	0	0	0	0	0	0	0	0	0	0	0	0	0	0	0
88	2019-12-02	2/12/2019	0	2	III	W11	1	1	W11.1	8	1	1	1	0	0	1	0	0	1	1	0	1		1	0	0	0	0	0	0	0	0	0	1	0	0	0	0	0	0	0	0	0	0	0	0	0	1	0
89	2019-12-02	2/12/2019	0	2	III	W12	1	1	W12.1	9	1	1	0	0	0	1	0	0	0	0	0	1		1	0	0	0	0	0	0	0	0	0	0	0	0	0	0	0	0	0	0	0	0	0	0	0	0	0
90	2019-12-02	2/12/2019	0	2	III	W13	1	1	W13.1	10	1	1	0	0	0	1	0	0	1	1	0	1		1	0	0	0	0	0	0	0	0	0	0	0	0	0	0	0	0	0	0	0	0	0	0	0	0	0
91	2019-12-02	2/12/2019	0	2	III	W14	1	1	W14.1	11	1	1	0	0	0	0	0	0	0	0	0	1		1	0	0	0	0	0	0	0	0	0	0	0	0	0	0	0	0	0	0	0	0	0	0	0	0	0
92	2019-12-02	2/12/2019	0	2	III	W15	1	1	W15.1	12	1	1	0	0	0	1	0	0	1	1	0	1		1	0	0	0	0	0	0	0	0	0	1	0	0	0	0	0	0	0	0	0	0	0	0	0	1	0
93	2019-12-02	3/12/2019	1	0	III	F01W	1	1	FW1.2	13	1	1	0	0	0	1	0	0	1	1	0	1		1	0	0	0	0	0	0	0	0	0	1	0	0	0	0	0	0	0	0	0	0	0	0	0	1	0
98	2019-12-02	3/12/2019	1	1	III	F06W	1	1	FW6.1	14	1	1	0	0	0	1	0	0	1	1	0	1		1	0	0	0	0	0	0	0	0	0	1	0	0	0	0	0	0	0	0	0	0	0	0	0	1	0
102	2019-12-02	3/12/2019	1	1	III	F10W	1	1	FW10.1	15	1	1	0	0	0	1	0	0	1	1	0	1		1	0	0	0	0	0	0	0	0	0	1	0	0	0	0	0	0	0	0	0	0	0	0	0	0	0
106	2019-12-02	3/12/2019	1	2	III	F14W	1	1	FW14.1	16	1	1	0	0	0	1	0	0	1	1	0	1		1	0	0	0	0	0	0	0	0	0	1	0	0	0	0	0	0	0	0	0	0	0	0	0	1	0
107	2019-12-02	3/12/2019	1	2	III	F14W	1	1	FW14.2	17	1	0	1	0	0	1	0	0	1	1	0	0		1	0	0	0	0	0	0	0	0	0	1	0	0	0	0	0	0	0	0	0	0	0	0	0	1	0
109	2019-12-02	3/12/2019	2	0	III	F01I	1	1	I1.1	18	1	1	0	0	0	1	0	0	1	1	0	1	6	1	0	0	0	0	0	0	0	0	0	1	0	0	0	0	0	0	0	0	0	0	0	0	0	1	0
112	2019-12-02	3/12/2019	2	0	III	F04I	1	1	I4.1	19	1	1	0	0	0	1	1	0	1	1	0	1	7	1	0	0	0	0	0	0	0	0	0	0	0	0	0	0	0	0	0	0	0	0	0	0	0	0	0
113	2019-12-02	3/12/2019	2	0	III	F05I	1	1	I5.1	20	1	1	0	0	0	0	0	0	0	0	0	1	3	1	0	0	0	0	0	0	0	0	0	0	0	0	0	0	0	0	0	0	0	0	0	0	0	0	0
114	2019-12-02	3/12/2019	2	0	III	F05I	1	1	I5.2	21	1	0	1	0	1	1	1	0	1	1	0	0	7	1	0	0	0	0	0	0	0	0	0	1	0	0	0	0	0	0	0	0	0	0	0	0	0	1	0
115	2019-12-02	3/12/2019	2	1	III	F06I	1	1	I6.1	22	1	1	0	0	0	1	0	0	0	1	0	0	4	1	0	0	0	0	0	0	0	0	0	1	0	0	0	0	0	0	0	0	0	0	0	0	0	1	0
116	2019-12-02	3/12/2019	2	1	III	F07I	1	1	I7.1	23	1	1	0	0	0	0	0	0	0	1	0	0	3	1	0	0	0	0	0	0	0	0	0	0	0	0	0	0	0	0	0	0	0	0	0	0	0	0	0
117	2019-12-02	3/12/2019	2	1	III	F08I	1	1	I8.1	24	1	1	0	0	0	1	0	0	1	1	0	0	5	1	0	0	0	0	0	0	0	0	0	1	0	0	0	0	0	0	0	0	0	0	0	0	0	1	0
118	2019-12-02	3/12/2019	2	1	III	F09I	1	1	I9.1	25	1	1	0	1	0	1	1	0	1	1	0	1	8	1	0	0	0	0	0	0	0	0	0	1	0	0	0	0	0	0	0	0	0	0	0	0	0	1	0
124	2019-12-02	3/12/2019	2	2	III	F15I	1	1	I15.1	26	1	1	0	0	0	0	0	0	1	1	0	1	5	1	0	0	0	0	0	0	0	0	0	0	0	0	0	0	0	0	0	0	0	0	0	0	0	0	0
125	2019-12-02	3/12/2019	2	2	III	F15I	1	1	I15.2	27	1	1	0	0	0	1	0	0	1	1	0	1	6	1	0	0	0	0	0	0	0	0	0	1	0	0	0	0	0	0	0	0	0	0	0	0	0	1	0
145	2019-12-02	3/12/2019	4	0	III	F05L	1	1	L5.1	28	1	1	0	0	0	0	0	0	0	0	0	1		1	0	0	0	0	0	0	0	0	0	0	0	0	0	0	0	0	0	0	0	0	0	0	0	0	0
412	2020-07-11	2020-07-12	0	3	VII	W03	1	2	W3.2	1	1	1	0	0	0	1	0	0	1	1	0	1		1	0	0	0	0	0	0	0	0	0	1	0	0	0	0	0	0	0	0	0	0	0	0	0	1	0
169	2020-01-29	2020-01-29	0	2	IV	W12	1	4	W12.1	10	1	1	0	0	0	1	1	0	1	1	0	1		1	0	0	0	0	0	0	0	0	0	1	0	0	0	0	0	0	0	0	0	0	0	0	0	1	0
413	2020-07-11	2020-07-12	0	3	VII	W03	1	2	W3.3	2	1	0	1	0	0	1	1	0	1	1	0	0		1	0	0	0	0	0	0	0	0	0	1	0	0	0	0	0	0	0	0	0	0	0	0	0	1	0
414	2020-07-11	2020-07-12	0	3	VII	W04	1	2	W4.1	3	1	0	1	0	0	1	1	0	1	1	0	0		1	0	0	0	0	0	0	0	0	0	1	0	0	0	0	0	0	0	0	0	0	0	0	0	1	0
170	2020-01-29	2020-01-29	0	2	IV	W13	1	4	W13.1	11	1	1	0	0	0	1	0	0	1	1	0	1		1	0	0	0	0	0	0	0	0	0	1	0	0	0	0	0	0	0	0	0	0	0	0	0	1	0
416	2020-07-11	2020-07-12	0	3	VII	W04	1	2	W4.2	4	1	1	1	0	0	1	1	0	1	1	0	0		1	0	0	0	0	0	0	0	0	0	1	0	0	0	0	0	0	0	0	0	0	0	0	0	1	0
417	2020-07-11	2020-07-12	0	2	VII	W06	1	2	W6.1	5	1	1	1	0	0	1	0	0	1	1	0	0		1	1	0	0	0	0	0	0	0	0	1	0	0	0	0	0	0	0	0	0	0	0	0	0	0	0
172	2020-01-29	2020-01-29	0	2	IV	W15	1	4	W15.1	12	1	1	0	0	0	1	0	0	1	1	0	1		1	0	0	0	0	0	0	0	0	0	1	0	0	0	0	0	0	0	0	0	0	0	0	0	1	0
194	2020-01-29	2020-01-30	2	1	IV	F06I	1	4	I6.1	13	0	0	0	0	0	0	0	0	0	0	0	0		0	0	0	0	0	0	0	0	0	0	0	0	0	0	0	0	0	0	0	0	0	0	0	0	0	0
179	2020-01-29	2020-01-30	1	1	IV	F06W	1	4	FW6.1	14	0	0	0	0	0	0	0	0	0	0	0	0		0	0	0	0	0	0	0	0	0	0	0	0	0	0	0	0	0	0	0	0	0	0	0	0	0	0
185	2020-01-29	2020-01-30	1	2	IV	F12W	1	4	FW12.1	15	1	1	0	0	0	1	0	0	1	1	0	1		1	0	0	0	0	0	0	0	0	0	1	0	0	0	0	0	0	0	0	0	0	0	0	0	1	0
235	2020-03-07	2020-03-07	0	2	V	W02	1	4	W2.1	16	1	1	0	0	0	1	1	0	1	1	0	1		1	0	0	0	0	0	0	0	0	0	1	0	0	0	0	0	0	0	0	0	0	0	0	0	1	0
236	2020-03-07	2020-03-07	0	2	V	W03	1	4	W3.1	17	1	1	0	0	0	1	0	0	1	1	0	1		1	0	0	0	0	0	0	0	0	0	1	0	0	0	0	0	0	0	0	0	0	0	0	0	1	0
237	2020-03-07	2020-03-07	0	2	V	W03	1	4	W3.2	18	1	1	0	0	0	1	0	0	1	1	0	1		1	0	0	0	0	0	0	0	0	0	1	0	0	0	0	0	0	0	0	0	0	0	0	0	1	0
239	2020-03-07	2020-03-07	0	2	V	W05	1	4	W5.1	19	1	1	0	0	0	1	0	0	1	1	0	1		1	0	0	0	0	0	0	0	0	0	1	0	0	0	0	0	0	0	0	0	0	0	0	0	1	0
242	2020-03-07	2020-03-07	0	1	V	W07	1	4	W7.1	20	1	1	0	0	0	1	0	0	1	1	0	1		1	0	0	0	0	0	0	0	0	0	1	0	0	0	0	0	0	0	0	0	0	0	0	0	1	0
245	2020-03-07	2020-03-07	0	1	V	W10	1	4	W10.1	21	1	1	0	0	0	1	0	0	1	1	0	1		1	0	0	0	0	0	0	0	0	0	1	0	0	0	0	0	0	0	0	0	0	0	0	0	1	0
246	2020-03-07	2020-03-07	0	1	V	W10	1	4	W10.2	22	1	1	0	0	0	1	1	0	1	1	0	1		1	0	0	0	0	0	0	0	0	0	1	0	0	0	0	0	0	0	0	0	0	0	0	0	1	0
240	2020-03-07	2020-03-07	0	2	V	W05	1	5	W5.3	1	1	1	0	0	0	1	0	0	1	1	0	1		1	0	0	0	0	0	0	0	0	0	1	0	0	0	0	0	0	0	0	0	0	0	0	0	1	0
247	2020-03-07	2020-03-07	0	1	V	W10	1	4	W10.4	23	1	1	0	0	0	1	0	0	1	1	0	1		1	0	0	0	0	0	0	0	0	0	1	0	0	0	0	0	0	0	0	0	0	0	0	0	1	0
248	2020-03-07	2020-03-07	0	1	V	W11	1	4	W11.1	24	1	1	0	0	0	1	1	0	1	1	0	1		1	0	0	0	0	0	0	0	0	0	1	0	0	0	0	0	0	0	0	0	0	0	0	0	1	0
249	2020-03-07	2020-03-07	0	1	V	W11	1	4	W11.2	25	1	1	0	0	0	1	0	0	1	1	0	1		1	0	0	0	0	0	0	0	0	0	1	0	0	0	0	0	0	0	0	0	0	0	0	0	1	0
250	2020-03-07	2020-03-07	0	1	V	W12	1	4	W12.1	26	1	1	0	0	0	0	0	0	1	0	0	1		1	0	0	0	0	0	0	0	0	0	0	0	0	0	0	0	0	0	0	0	0	0	0	0	0	0
251	2020-03-07	2020-03-07	0	1	V	W12	1	4	W12.2	27	1	1	0	0	0	1	1	0	1	1	0	1		1	0	0	0	0	0	0	0	0	0	1	0	0	0	0	0	0	0	0	0	0	0	0	0	1	0
252	2020-03-07	2020-03-07	0	1	V	W13	1	4	W13.1	28	1	1	0	0	0	1	1	0	1	1	0	1		1	0	0	0	0	0	0	0	0	0	1	0	0	0	0	0	0	0	0	0	0	0	0	0	1	0
254	2020-03-07	2020-03-07	0	1	V	W14	1	4	W14.1	29	1	1	0	0	0	0	0	0	0	0	0	1		1	0	0	0	0	0	0	0	0	0	0	0	0	0	0	0	0	0	0	0	0	0	0	0	0	0
255	2020-03-07	2020-03-07	0	1	V	W15	1	4	W15.1	30	0	0	0	0	0	0	0	0	0	0	0	0		0	0	0	0	0	0	0	0	0	0	0	0	0	0	0	0	0	0	0	0	0	0	0	0	0	0
262	2020-03-07	2020-03-08	1	1	V	F07W	1	4	FW7.1	31	0	0	0	0	0	0	0	0	0	0	0	0		0	0	0	0	0	0	0	0	0	0	0	0	0	0	0	0	0	0	0	0	0	0	0	0	0	0
253	2020-03-07	2020-03-07	0	1	V	W13	1	5	W13.3	2	1	1	0	0	0	1	0	0	0	0	0	1		1	0	0	0	0	0	0	0	0	0	0	0	0	0	0	0	0	0	0	0	0	0	0	0	0	0
263	2020-03-07	2020-03-08	1	1	V	F08W	1	4	FW8.1	32	0	0	0	0	0	0	0	0	0	0	0	0		0	0	0	0	0	0	0	0	0	0	0	0	0	0	0	0	0	0	0	0	0	0	0	0	0	0
264	2020-03-07	2020-03-08	1	1	V	F09W	1	4	FW9.1	33	0	0	0	0	0	0	0	0	0	0	0	0		0	0	0	0	0	0	0	0	0	0	0	0	0	0	0	0	0	0	0	0	0	0	0	0	0	0
266	2020-03-07	2020-03-08	1	1	V	F11W	1	4	FW11.1	34	1	1	0	0	0	1	1	0	1	1	0	1		1	0	0	0	0	0	0	0	0	0	1	0	0	0	0	0	0	0	0	0	0	0	0	0	1	0
270	2020-03-07	2020-03-08	1	1	V	F15W	1	4	FW15.1	35	1	1	0	0	0	1	1	0	1	1	0	1		1	0	0	0	0	0	0	0	0	0	1	0	0	0	0	0	0	0	0	0	0	0	0	0	1	0
278	2020-03-07	2020-03-08	2	1	V	F08I	1	4	I8.1	36	1	1	0	0	0	1	1	0	1	1	0	1	7	1	0	0	0	0	0	0	0	0	0	1	0	0	0	0	0	0	0	0	0	0	0	0	0	1	0
285	2020-03-07	2020-03-08	2	1	V	F14I	1	4	I14.1	37	0	0	0	0	0	0	0	0	0	0	0	0		0	0	0	0	0	0	0	0	0	0	0	0	0	0	0	0	0	0	0	0	0	0	0	0	0	0
286	2020-03-07	2020-03-08	2	1	V	F15I	1	4	I15.1	38	1	1	0	0	0	1	0	0	1	1	0	1	6	1	0	0	0	0	0	0	0	0	0	1	0	0	0	0	0	0	0	0	0	0	0	0	0	1	0
157	2020-01-29	2020-01-29	0	0	IV	W01	1	4	W1.3	39	1	1	0	0	0	1	0	0	1	1	0	1		1	0	0	0	0	0	0	0	0	0	1	0	0	0	0	0	0	0	0	0	0	0	0	0	1	0
279	2020-03-07	2020-03-08	2	1	V	F08I	1	5	I8.3	3	1	1	0	0	0	1	0	0	1	1	0	1	6	1	0	0	0	0	0	0	0	0	0	1	0	0	0	0	0	0	0	0	0	0	0	0	0	1	0
163	2020-01-29	2020-01-29	0	1	IV	W06	1	4	W6.3	40	1	1	0	0	0	1	1	0	1	1	0	1		1	0	0	0	0	0	0	0	0	0	1	0	0	0	0	0	0	0	0	0	0	0	0	0	1	0
173	2020-01-29	2020-01-29	0	2	IV	W15	1	4	W15.3	41	1	1	0	0	0	1	0	0	1	1	0	1		1	0	0	0	0	0	0	0	0	0	1	0	0	0	0	0	0	0	0	0	0	0	0	0	1	0
287	2020-03-07	2020-03-08	2	1	V	F15I	1	5	I15.3	4	1	1	0	0	0	1	0	0	1	1	0	1	6	1	0	0	0	0	0	0	0	0	0	1	0	0	0	0	0	0	0	0	0	0	0	0	0	1	0
318	2020-05-14	2020-05-14	0	3	VI	W01	1	3	W1.1	1	1	0	1	0	0	1	1	0	1	1	0	0		0	0	0	0	0	0	0	0	0	0	1	0	0	0	0	0	0	0	0	0	0	0	0	0	1	0
319	2020-05-14	2020-05-14	0	3	VI	W01	1	3	W1.2	2	1	1	0	0	0	1	1	0	1	1	0	1		0	0	0	0	0	0	0	0	0	0	1	0	0	0	0	0	0	0	0	0	0	0	0	0	1	0
320	2020-05-14	2020-05-14	0	3	VI	W01	1	3	W1.4	3	1	1	0	0	0	1	1	0	1	1	0	1		0	0	0	0	0	0	0	0	0	0	1	0	0	0	0	0	0	0	0	0	0	0	0	0	1	0
321	2020-05-14	2020-05-14	0	3	VI	W01	1	3	W1.5	4	1	0	1	0	0	1	1	0	1	1	0	0		0	0	0	0	0	0	0	0	0	0	1	0	0	0	0	0	0	0	0	0	0	0	0	0	1	0
322	2020-05-14	2020-05-14	0	3	VI	W02	1	3	W2.1	5	1	1	0	0	0	1	1	0	1	1	0	1		0	0	0	0	0	0	0	0	0	0	1	0	0	0	0	0	0	0	0	0	0	0	0	0	1	0
323	2020-05-14	2020-05-14	0	3	VI	W02	1	3	W2.3	6	1	1	0	0	0	1	0	0	1	1	0	1		0	0	0	0	0	0	0	0	0	0	1	0	0	0	0	0	0	0	0	0	0	0	0	0	1	0
324	2020-05-14	2020-05-14	0	3	VI	W02	1	3	W2.4	7	1	1	0	0	0	1	1	0	1	1	0	1		0	0	0	0	0	0	0	0	0	0	1	0	0	0	0	0	0	0	0	0	0	0	0	0	1	0
325	2020-05-14	2020-05-14	0	3	VI	W02	1	3	W2.5	8	1	1	0	0	1	1	1	0	1	1	0	1		0	0	0	0	0	0	0	0	0	0	1	0	0	0	0	0	0	0	0	0	0	0	0	0	1	0
326	2020-05-14	2020-05-14	0	3	VI	W03	1	3	W3.1	9	1	1	0	0	0	1	1	0	1	1	0	1		0	0	0	0	0	0	0	0	0	0	0	0	0	0	0	0	0	0	0	0	0	0	0	0	0	0
327	2020-05-14	2020-05-14	0	3	VI	W04	1	3	W4.1	10	0	0	0	0	0	0	0	0	0	1	0	0		0	0	0	0	0	0	0	0	0	0	0	0	0	0	0	0	0	0	0	0	0	0	0	0	0	0
328	2020-05-14	2020-05-14	0	3	VI	W04	1	3	W4.3	11	0	0	0	0	0	0	0	0	1	0	0	0		0	0	0	0	0	0	0	0	0	0	0	0	0	0	0	0	0	0	0	0	0	0	0	0	0	0
329	2020-05-14	2020-05-14	0	3	VI	W05	1	3	W5.1	12	0	0	0	0	0	0	0	0	1	0	0	0		0	0	0	0	0	0	0	0	0	0	0	0	0	0	0	0	0	0	0	0	0	0	0	0	0	0
330	2020-05-14	2020-05-14	0	2	VI	W06	1	3	W6.1	13	1	1	0	0	0	1	1	0	1	1	0	1		0	0	0	0	0	0	0	0	0	0	1	0	0	0	0	0	0	0	0	0	0	0	0	0	1	0
331	2020-05-14	2020-05-15	0	2	VI	W07	1	3	W7.1	14	0	0	0	0	0	0	1	0	1	1	0	0		0	0	0	0	0	0	0	0	0	0	0	0	0	0	0	0	0	0	0	0	0	0	0	0	0	0
332	2020-05-14	2020-05-15	0	2	VI	W08	1	3	W8.1	15	0	0	0	0	0	0	0	0	0	0	0	0		0	0	0	0	0	0	0	0	0	0	0	0	0	0	0	0	0	0	0	0	0	0	0	0	0	0
333	2020-05-14	2020-05-15	0	2	VI	W08	1	3	W8.2	16	1	0	1	0	0	1	1	0	1	1	0	0		0	0	0	0	0	0	0	0	0	0	1	0	0	0	0	0	0	0	0	0	0	0	0	0	1	0
334	2020-05-14	2020-05-15	0	2	VI	W09	1	3	W9.1	17	0	0	0	0	0	0	0	0	0	0	0	0		0	0	0	0	0	0	0	0	0	0	0	0	0	0	0	0	0	0	0	0	0	0	0	0	0	0
335	2020-05-14	2020-05-15	0	2	VI	W10	1	3	W10.1	18	0	0	0	0	0	0	0	0	0	0	0	0		0	0	0	0	0	0	0	0	0	0	0	0	0	0	0	0	0	0	0	0	0	0	0	0	0	0
336	2020-05-14	2020-05-15	0	0	VI	W11	1	3	W11.1	19	1	1	0	0	0	1	1	0	1	1	0	1		1	0	0	0	0	0	0	0	0	0	1	0	0	0	0	0	0	0	0	0	0	0	0	0	1	0
337	2020-05-14	2020-05-15	0	0	VI	W12	1	3	W12.1	20	1	0	0	1	1	1	0	0	1	0	0	0		0	0	1	0	0	0	0	0	0	0	0	0	0	0	0	0	0	0	1	0	0	0	0	0	0	1
338	2020-05-14	2020-05-15	0	0	VI	W12	1	3	W12..2	21	1	1	0	0	0	1	1	0	1	1	0	1		0	0	0	0	0	0	0	0	0	0	1	0	0	0	0	0	0	0	0	0	0	0	0	0	1	0
339	2020-05-14	2020-05-15	0	0	VI	W13	1	3	W13.1	22	1	0	0	0	0	1	0	0	1	1	0	0		0	0	0	0	0	0	0	0	0	0	1	0	0	0	0	0	0	0	0	0	0	0	0	0	1	0
340	2020-05-14	2020-05-15	0	0	VI	W13	1	3	W13.3	23	1	0	0	0	0	1	0	0	1	1	0	0		0	0	0	0	0	0	0	0	0	0	1	0	0	0	0	0	0	0	0	0	0	0	0	0	1	0
341	2020-05-14	2020-05-15	0	0	VI	W14	1	3	W14.1	24	1	0	0	0	0	1	0	0	1	1	0	0		0	0	0	0	0	0	0	0	0	0	1	0	0	0	0	0	0	0	0	0	0	0	0	0	1	0
342	2020-05-14	2020-05-15	0	0	VI	W14	1	3	W14.3	25	1	0	0	0	0	1	0	0	1	1	0	0		0	0	0	0	0	0	0	0	0	0	1	0	0	0	0	0	0	0	0	0	0	0	0	0	1	0
343	2020-05-14	2020-05-15	0	0	VI	W15	1	3	W15.1	26	1	1	0	0	0	1	1	0	1	1	0	1		0	0	0	0	0	0	0	0	0	0	1	0	0	0	0	0	0	0	0	0	0	0	0	0	1	0
344	2020-05-14	2020-05-15	0	0	VI	W15	1	3	W15.3	27	1	0	0	1	1	1	0	0	1	1	0	0		0	0	1	0	0	0	0	0	0	0	0	0	0	0	0	0	0	0	1	0	0	0	0	0	0	1
362	2020-05-14	2020-05-14	2	3	VI	F02I	1	3	I2.1	28	0	0	0	0	0	0	0	0	1	0	0	0		0	0	1	0	0	0	0	0	0	0	0	0	0	0	0	0	0	0	1	0	0	0	0	0	0	1
363	2020-05-14	2020-05-14	2	3	VI	F03I	1	3	I3.1	29	1	1	1	0	0	1	1	0	1	1	0	1	8	0	0	0	0	0	0	0	0	0	0	1	0	0	0	0	0	0	0	0	0	0	0	0	0	1	0
364	2020-05-14	2020-05-14	2	3	VI	F04I	1	3	I4.1	30	1	1	1	0	0	1	1	0	1	1	0	1	8	0	0	0	0	0	0	0	0	0	0	1	0	0	0	0	0	0	0	0	0	0	0	0	0	1	0
366	2020-05-14	2020-05-14	2	2	VI	F06I	1	3	I6.1	31	0	0	0	0	0	0	0	0	0	0	0	0		0	0	0	0	0	0	0	0	0	0	0	0	0	0	0	0	0	0	0	0	0	0	0	0	0	0
367	2020-05-14	2020-05-15	2	2	VI	F07I	1	3	I7.1	32	0	0	0	0	0	0	0	0	0	0	0	0		0	0	0	0	0	0	0	0	0	0	0	0	0	0	0	0	0	0	0	0	0	0	0	0	0	0
368	2020-05-14	2020-05-15	2	2	VI	F07I	1	3	I7.3	33	1	1	0	1	0	0	0	0	0	1	0	1	5	0	0	0	0	0	0	0	0	0	0	0	0	0	0	0	0	0	0	0	0	0	0	0	0	0	0
369	2020-05-14	2020-05-15	2	2	VI	F08I	1	3	I8.1	34	0	0	0	0	0	0	0	0	0	0	0	0		0	0	0	0	0	0	0	0	0	0	0	0	0	0	0	0	0	0	0	0	0	0	0	0	0	0
370	2020-05-14	2020-05-15	2	2	VI	F09I	1	3	I9.1	35	0	0	0	0	0	0	0	0	0	0	0	0		0	0	0	0	0	0	0	0	0	0	0	0	0	0	0	0	0	0	0	0	0	0	0	0	0	0
373	2020-05-14	2020-05-15	2	0	VI	F12I	1	3	I12.2	36	1	0	0	0	0	1	0	0	1	0	0	0	3	0	0	0	0	0	0	0	0	0	0	1	0	0	0	0	0	0	0	0	0	0	0	0	0	1	0
346	2020-05-14	2020-05-14	1	3	VI	F02W	1	3	FW2.1	37	0	0	0	0	0	0	0	0	0	0	0	0		0	0	0	0	0	0	0	0	0	0	0	0	0	0	0	0	0	0	0	0	0	0	0	0	0	0
351	2020-05-14	2020-05-15	1	2	VI	F07W	1	3	FW7.1	38	1	1	0	0	0	1	1	0	1	1	0	1		0	0	0	0	0	0	0	0	0	0	1	0	0	0	0	0	0	0	0	0	0	0	0	0	1	0
352	2020-05-14	2020-05-15	1	2	VI	F07W	1	3	FW7.2	39	1	1	0	0	0	1	1	0	1	1	0	1		0	0	0	0	0	0	0	0	0	0	1	0	0	0	0	0	0	0	0	0	0	0	0	0	1	0
353	2020-05-14	2020-05-15	1	2	VI	F08W	1	3	FW8.1	40	0	0	0	0	0	0	0	0	0	0	0	0		0	0	0	0	0	0	0	0	0	0	0	0	0	0	0	0	0	0	0	0	0	0	0	0	0	0
354	2020-05-14	2020-05-15	1	2	VI	F09W	1	3	FW9.1	41	0	0	0	0	0	0	0	0	0	0	0	0		0	0	0	0	0	0	0	0	0	0	0	0	0	0	0	0	0	0	0	0	0	0	0	0	0	0
359	2020-05-14	2020-05-15	1	0	VI	F14W	1	3	FW14.1	42	1	0	1	0	0	1	0	0	1	1	0	1		0	0	0	0	0	0	0	0	0	0	1	0	0	0	0	0	0	0	0	0	0	0	0	0	1	0
581	2020-11-02	2020-11-03	0	2	IX	W02	1	1	W2.1	29	1	1	1	0	0	1	1	0	1	1	0	0		1	0	0	0	0	0	0	0	0	0	1	0	0	0	0	0	0	0	0	0	0	0	0	0	1	0
612	2020-11-02	2020-11-03	2	2	IX	F02I	1	1	I2.1	30	0	0	0	0	0	0	0	0	0	1	0	0		0	0	0	0	0	0	0	0	0	0	0	0	0	0	0	0	0	0	0	0	0	0	0	0	0	0
418	2020-07-11	2020-07-12	0	2	VII	W07	1	2	W7.1	6	1	1	1	0	0	1	0	0	1	1	0	0		1	0	0	0	0	0	0	0	0	0	1	0	0	0	0	0	0	0	0	0	0	0	0	0	1	0
419	2020-07-11	2020-07-12	0	2	VII	W07	1	2	W7.2	7	1	0	1	0	0	1	0	0	0	0	0	0		0	0	0	0	0	0	0	0	0	0	0	0	0	0	0	0	0	0	0	0	0	0	0	0	0	0
420	2020-07-11	2020-07-12	0	2	VII	W08	1	2	W8.1	8	1	1	0	0	0	1	1	0	1	1	0	1		1	0	0	0	0	0	0	0	0	0	1	0	0	0	0	0	0	0	0	0	0	0	0	0	1	0
422	2020-07-11	2020-07-12	0	2	VII	W09	1	2	W9.1	9	1	1	0	0	0	1	1	0	1	1	0	1		1	0	0	0	0	0	0	0	0	0	1	0	0	0	0	0	0	0	0	0	0	0	0	0	1	0
424	2020-07-11	2020-07-12	0	2	VII	W10	1	2	W10.1	10	1	0	1	0	0	1	1	0	1	1	0	0		1	0	0	0	0	0	0	0	0	0	1	0	0	0	0	0	0	0	0	0	0	0	0	0	1	0
425	2020-07-11	2020-07-12	0	0	VII	W11	1	2	W11.1	11	1	1	1	0	0	1	0	0	1	1	0	1		1	0	0	0	0	0	0	0	0	0	1	0	0	0	0	0	0	0	0	0	0	0	0	0	1	0
427	2020-07-11	2020-07-12	0	0	VII	W12	1	2	W12.1	12	1	1	1	0	0	1	0	0	1	1	0	1		1	0	0	0	0	0	0	0	0	0	1	0	0	0	0	0	0	0	0	0	0	0	0	0	1	0
428	2020-07-11	2020-07-12	0	0	VII	W12	1	2	W12.2	13	1	1	0	0	0	1	0	0	1	1	0	0		0	0	0	0	0	0	0	0	0	0	0	0	0	0	0	0	0	0	0	0	0	0	0	0	0	0
429	2020-07-11	2020-07-12	0	0	VII	W12	1	2	W12.3	14	1	1	0	0	0	1	0	0	0	0	0	1		1	1	0	0	0	0	0	0	0	0	1	0	0	0	0	0	0	0	0	0	0	0	0	0	1	0
432	2020-07-11	2020-07-12	0	0	VII	W15	1	2	W15.1	15	0	0	0	0	0	0	0	0	0	1	0	0		0	0	0	0	0	0	0	0	0	0	0	0	0	0	0	0	0	0	0	0	0	0	0	0	0	0
451	2020-07-11	2020-07-12	2	3	VII	F03I	1	2	I3.1	16	1	1	0	0	0	0	0	0	0	0	0	1	3	1	0	0	0	0	0	0	0	0	0	0	0	0	0	0	0	0	0	0	0	0	0	0	0	0	0
421	2020-07-11	2020-07-12	0	2	VII	W08	1	5	W8.3	5	1	0	0	0	0	1	0	0	1	1	1	0		1	0	0	0	0	0	0	0	0	0	1	0	0	0	0	0	0	0	0	0	0	0	0	0	1	0
454	2020-07-11	2020-07-12	2	3	VII	F05I	1	2	I5.1	17	1	0	1	0	0	1	1	0	1	1	0	0	6	1	0	0	0	0	0	0	0	0	0	1	0	0	0	0	0	0	0	0	0	0	0	0	0	1	0
423	2020-07-11	2020-07-12	0	2	VII	W09	1	4	W9.3	42	1	1	0	0	0	1	1	0	1	1	0	1		1	0	0	0	0	0	0	0	0	0	1	0	0	0	0	0	0	0	0	0	0	0	0	0	1	0
456	2020-07-11	2020-07-12	2	2	VII	F06I	1	2	I6.1	18	1	1	0	0	0	0	0	0	0	0	0	1	3	1	0	0	0	0	0	0	0	0	0	0	0	0	0	0	0	0	0	0	0	0	0	0	0	0	0
457	2020-07-11	2020-07-12	2	2	VII	F07I	1	2	I7.1	19	1	0	1	0	0	1	1	0	1	1	0	0	6	1	0	0	0	0	0	0	0	0	0	1	0	0	0	0	0	0	0	0	0	0	0	0	0	1	0
426	2020-07-11	2020-07-12	0	0	VII	W11	1	5	W11.3	6	1	0	1	0	0	1	1	0	1	1	1	0		1	0	0	0	0	0	0	0	0	0	1	0	0	0	0	0	0	0	0	0	0	0	0	0	1	0
458	2020-07-11	2020-07-12	2	2	VII	F08I	1	2	I8.1	20	0	0	0	0	0	0	0	0	0	1	0	0		0	0	0	0	0	0	0	0	0	0	0	0	0	0	0	0	0	0	0	0	0	0	0	0	0	0
459	2020-07-11	2020-07-12	2	2	VII	F08I	1	2	I8.2	21	0	0	0	0	0	0	0	0	0	1	0	0		0	0	0	0	0	0	0	0	0	0	0	0	0	0	0	0	0	0	0	0	0	0	0	0	0	0
460	2020-07-11	2020-07-12	2	2	VII	F08I	1	2	I8.3	22	0	0	0	0	0	0	0	0	0	0	0	0		0	0	0	0	0	0	0	0	0	0	0	0	0	0	0	0	0	0	0	0	0	0	0	0	0	0
461	2020-07-11	2020-07-12	2	2	VII	F08I	1	2	I8.4	23	0	0	0	0	0	0	0	0	0	0	0	0		0	0	0	0	0	0	0	0	0	0	0	0	0	0	0	0	0	0	0	0	0	0	0	0	0	0
433	2020-07-11	2020-07-12	0	0	VII	W15	1	5	W15.3	7	1	0	0	0	0	1	0	0	1	1	0	0		0	0	0	0	0	0	0	0	0	0	0	0	0	0	0	0	0	0	0	0	0	0	0	0	0	0
464	2020-07-11	2020-07-12	2	2	VII	F10I	1	2	I10.1	24	1	0	1	0	0	1	1	0	1	1	0	0	6	1	0	0	0	0	0	0	0	0	0	1	0	0	0	0	0	0	0	0	0	0	0	0	0	1	0
452	2020-07-11	2020-07-12	2	3	VII	F03I	1	5	I3.3	8	1	0	1	0	0	1	1	0	1	1	0	0	6	1	0	0	0	0	0	0	0	0	0	1	0	0	0	0	0	0	0	0	0	0	0	0	0	1	0
466	2020-07-11	2020-07-12	2	0	VII	F11I	1	2	I11.1	25	1	0	1	0	0	1	1	0	1	1	0	0	6	1	0	0	0	0	0	0	0	0	0	1	0	0	0	0	0	0	0	0	0	0	0	0	0	1	0
455	2020-07-11	2020-07-12	2	3	VII	F05I	1	5	I5.3	9	1	0	0	0	0	1	0	0	1	1	0	1	5	1	0	0	0	0	0	0	0	0	0	1	0	0	0	0	0	0	0	0	0	0	0	0	0	1	0
468	2020-07-11	2020-07-12	2	0	VII	F12I	1	2	I12.1	26	1	1	0	0	0	1	1	0	1	1	0	1	7	1	0	0	0	0	0	0	0	0	0	1	0	0	0	0	0	0	0	0	0	0	0	0	0	1	0
505	2020-08-30	2020-08-31	0	1	VIII	W04	1	2	W4.1	27	1	1	0	0	0	0	0	0	0	0	0	1		1	0	0	0	0	0	0	0	0	0	0	0	0	0	0	0	0	0	0	0	0	0	0	0	0	0
507	2020-08-30	2020-08-31	0	1	VIII	W05	1	2	W5.1	28	1	1	1	0	0	1	1	0	1	1	0	0		1	0	0	0	0	0	0	0	0	0	1	0	0	0	0	0	0	0	0	0	0	0	0	0	1	0
509	2020-08-30	2020-08-31	0	4	VIII	W07	1	2	W7.1	29	1	1	1	0	0	1	1	0	1	1	0	0		1	0	0	0	0	0	0	0	0	0	1	0	0	0	0	0	0	0	0	0	0	0	0	0	1	0
513	2020-08-30	2020-08-31	0	4	VIII	W10	1	2	W10.1	30	1	1	1	0	0	1	1	0	1	1	0	0		1	0	0	0	0	0	0	0	0	0	1	0	0	0	0	0	0	0	0	0	0	0	0	0	1	0
516	2020-08-30	2020-08-31	0	0	VIII	W13	1	2	W13.1	31	1	1	1	0	0	1	1	0	1	1	0	0		1	0	0	0	0	0	0	0	0	0	1	0	0	0	0	0	0	0	0	0	0	0	0	0	1	0
462	2020-07-11	2020-07-12	2	2	VII	F08I	1	5	I8.5	10	0	0	0	0	0	0	0	0	0	1	0	0		0	0	0	0	0	0	0	0	0	0	0	0	0	0	0	0	0	0	0	0	0	0	0	0	0	0
536	2020-08-30	2020-08-31	2	1	VIII	F03I	1	2	I3.1	32	0	0	0	0	0	0	0	0	0	0	0	0		0	0	0	0	0	0	0	0	0	0	0	0	0	0	0	0	0	0	0	0	0	0	0	0	0	0
465	2020-07-11	2020-07-12	2	2	VII	F10I	1	5	I10.3	11	1	0	1	0	0	1	1	0	1	1	0	0	6	1	0	0	0	0	0	0	0	0	0	1	0	0	0	0	0	0	0	0	0	0	0	0	0	1	0
542	2020-08-30	2020-08-31	2	4	VIII	F09I	1	2	I9.1	33	1	1	0	0	0	1	1	0	1	1	0	1	7	1	0	0	0	0	0	0	0	0	0	1	0	0	0	0	0	0	0	0	0	0	0	0	0	1	0
467	2020-07-11	2020-07-12	2	0	VII	F11I	1	5	I11.3	12	1	1	0	0	0	1	0	0	1	1	0	1	6	1	0	0	0	0	0	0	0	0	0	1	0	0	0	0	0	0	0	0	0	0	0	0	0	1	0
543	2020-08-30	2020-08-31	2	4	VIII	F09I	1	2	I9.2	34	1	1	0	0	0	1	1	0	1	1	0	1	7	1	0	0	0	0	0	0	0	0	0	1	0	0	0	0	0	0	0	0	0	0	0	0	0	1	0
545	2020-08-30	2020-08-31	2	0	VIII	F11I	1	2	I11.1	35	0	0	0	0	0	0	0	0	0	0	0	0		0	0	0	0	0	0	0	0	0	0	0	0	0	0	0	0	0	0	0	0	0	0	0	0	0	0
506	2020-08-30	2020-08-31	0	1	VIII	W04	1	5	W4.3	13	1	1	0	0	0	0	0	0	0	0	0	1		1	0	0	0	0	0	0	0	0	0	0	0	0	0	0	0	0	0	0	0	0	0	0	0	0	0
547	2020-08-30	2020-08-31	2	0	VIII	F13I	1	2	I13.1	36	1	1	1	0	0	1	1	0	1	1	0	0	7	1	0	0	0	0	0	0	0	0	0	1	0	0	0	0	0	0	0	0	0	0	0	0	0	1	0
156	2020-01-29	2020-01-29	0	0	IV	W01	1	2	W1.1	37	1	1	0	0	0	1	1	0	1	1	0	1		1	0	0	0	0	0	0	0	0	0	1	0	0	0	0	0	0	0	0	0	0	0	0	0	1	0
510	2020-08-30	2020-08-31	0	4	VIII	W07	1	5	W7.3	14	1	1	1	0	0	1	1	0	1	1	0	1		1	0	0	0	0	0	0	0	0	0	1	0	0	0	0	0	0	0	0	0	0	0	0	0	1	0
160	2020-01-29	2020-01-29	0	0	IV	W04	1	2	W4.1	38	1	1	0	0	0	1	1	0	1	1	0	1		1	0	0	0	0	0	0	0	0	0	1	0	0	0	0	0	0	0	0	0	0	0	0	0	1	0
162	2020-01-29	2020-01-29	0	1	IV	W06	1	2	W6.1	39	1	1	0	0	0	1	1	0	1	1	0	1		1	0	0	0	0	0	0	0	0	0	1	0	0	0	0	0	0	0	0	0	0	0	0	0	1	0
165	2020-01-29	2020-01-29	0	1	IV	W08	1	2	W8.1	40	1	1	0	0	0	1	1	0	1	1	0	1		1	0	0	0	0	0	0	0	0	0	1	0	0	0	0	0	0	0	0	0	0	0	0	0	1	0
168	2020-01-29	2020-01-29	0	2	IV	W11	1	2	W11.1	41	1	1	0	0	0	1	1	0	1	1	0	1		1	0	0	0	0	0	0	0	0	0	1	0	0	0	0	0	0	0	0	0	0	0	0	0	1	0
409	2020-07-11	2020-07-12	0	3	VII	W01	1	2	W1.3	42	1	0	1	0	0	1	1	0	1	1	0	0		1	0	0	0	0	0	0	0	0	0	1	0	0	0	0	0	0	0	0	0	0	0	0	0	1	0
410	2020-07-11	2020-07-12	0	3	VII	W02	1	2	W2.1	43	1	1	0	0	0	1	0	0	1	1	0	1		1	0	0	0	0	0	0	0	0	0	1	0	0	0	0	0	0	0	0	0	0	0	0	0	1	0
411	2020-07-11	2020-07-12	0	3	VII	W03	1	2	W3.1	44	1	1	0	0	0	1	1	0	1	1	0	1		1	0	0	0	0	0	0	0	0	0	1	0	0	0	0	0	0	0	0	0	0	0	0	0	1	0
613	2020-11-02	2020-11-03	2	2	IX	F03I	1	1	I3.1	31	0	0	0	0	0	0	0	0	0	0	0	0		0	0	0	0	0	0	0	0	0	0	0	0	0	0	0	0	0	0	0	0	0	0	0	0	0	0
614	2020-11-02	2020-11-03	2	1	IX	F04I	1	1	I4.1	32	1	1	1	0	0	1	1	0	1	1	0	0	7	1	0	0	0	0	0	0	0	0	0	1	0	0	0	0	0	0	0	0	0	0	0	0	0	1	0
619	2020-11-02	2020-11-03	2	1	IX	F08I	1	5	I8.3	15	1	0	0	0	0	1	1	0	1	1	0	0	5	1	0	0	0	0	0	0	0	0	0	1	0	0	0	0	0	0	0	0	0	0	0	0	0	1	0
615	2020-11-02	2020-11-03	2	1	IX	F05I	1	1	I5.1	33	0	0	0	0	0	0	0	0	0	1	0	0		0	0	0	0	0	0	0	0	0	0	0	0	0	0	0	0	0	0	0	0	0	0	0	0	0	0
616	2020-11-02	2020-11-03	2	1	IX	F06I	1	1	I6.1	34	0	0	0	0	0	0	0	0	1	1	0	0		0	0	0	0	0	0	0	0	0	0	0	0	0	0	0	0	0	0	0	0	0	0	0	0	0	0
617	2020-11-02	2020-11-03	2	1	IX	F07I	1	1	I7.1	35	0	1	0	0	0	0	0	0	0	0	0	1		0	0	0	0	0	0	0	0	0	0	0	0	0	0	0	0	0	0	0	0	0	0	0	0	0	0
618	2020-11-02	2020-11-03	2	1	IX	F08I	1	1	I8.1	36	1	0	1	0	0	1	0	0	1	1	0	0	5	1	0	0	0	0	0	0	0	0	0	1	0	0	0	0	0	0	0	0	0	0	0	0	0	1	0
624	2020-11-02	2020-11-03	2	0	IX	F13I	1	1	I13.1	37	1	1	1	0	0	1	1	0	1	1	0	0	7	1	0	0	0	0	0	0	0	0	0	1	0	0	0	0	0	0	0	0	0	0	0	0	0	1	0
626	2020-11-02	2020-11-03	2	0	IX	F15I	1	1	I15.1	38	1	1	1	0	0	1	1	0	1	1	0	0	7	1	0	0	0	0	0	0	0	0	0	1	0	0	0	0	0	0	0	0	0	0	0	0	0	1	0
597	2020-11-02	2020-11-03	1	2	IX	F03W	1	1	FW3.1	39	1	1	1	0	0	1	1	0	1	1	0	1		1	0	0	0	0	0	0	0	0	0	1	0	0	0	0	0	0	0	0	0	0	0	0	0	1	0
601	2020-11-02	2020-11-03	1	1	IX	F06W	1	1	FW6.1	40	0	0	0	0	0	0	0	0	0	1	0	0		0	0	0	0	0	0	0	0	0	0	0	0	0	0	0	0	0	0	0	0	0	0	0	0	0	0
604	2020-11-02	2020-11-03	1	1	IX	F09W	1	1	FW9.1	41	0	0	0	0	0	0	0	0	0	1	0	0		0	0	0	0	0	0	0	0	0	0	0	0	0	0	0	0	0	0	0	0	0	0	0	0	0	0
605	2020-11-02	2020-11-03	1	0	IX	F10W	1	1	FW10.1	42	0	0	0	0	0	0	0	0	0	1	0	0		0	0	0	0	0	0	0	0	0	0	0	0	0	0	0	0	0	0	0	0	0	0	0	0	1	0
606	2020-11-02	2020-11-03	1	0	IX	F11W	1	1	FW11.1	43	0	0	0	0	0	0	0	0	0	0	0	0		0	0	0	0	0	0	0	0	0	0	0	0	0	0	0	0	0	0	0	0	0	0	0	0	0	0
598	2020-11-02	2020-11-03	1	2	IX	F03W	1	5	FW3.3	16	1	1	0	0	0	1	1	0	1	1	0	1		1	0	0	0	0	0	0	0	0	0	1	0	0	0	0	0	0	0	0	0	0	0	0	0	1	0
407	2020-07-11	2020-07-12	0	3	VII	W01	1	1	W1.1	44	1	0	1	0	0	1	1	0	1	1	0	0		1	0	0	0	0	0	0	0	0	0	1	0	0	0	0	0	0	0	0	0	0	0	0	0	1	0
[truncated: 14 more columns]

## Sheet: A.hydrophila
Collected date	Pdate	Month	Code	Sample	Farm	Sample	lot	IDS	AER	AH	Amp	Chloram	Cipro	Enro	Genta	OTC	Oxo	Strep	Sulfa	Tet	Tri	Florfenicol	TEM	Sul1	Sul2	Sul3	int1	int2	int3	CTX-M	qnrA	qnrB	qnrS	ermB	SHV	dfrA1	dfrA12	catA	catB	cmlA	strA	strB	tetD	adda1	tetA	tetB	floR	mcr-1	mcr-2
2019-10-01	2019-10-01	10	W02	0	0	W2.1	1	9	1	1	128	<1	<0.015	0.015	0.5	1	0.06	8	16	0.5	8	S	0	0	0	0	0	0	0	0	0	0	0	0	0	0	0	0	0	0	0	0	0	0	0	0	0	0	0
2020-01-29	2020-01-29	1	W01	0	0	W1.1	1	26	1	1	128	<1	<0.015	<0.0075	0.5	1	0.03	4	32	0.5	1	S	0	0	0	0	0	0	0	0	0	0	0	0	0	0	0	0	0	0	0	0	0	0	0	0	0	0	0
2020-03-07	2020-03-07	3	W07	0	1	W7.1	1	40	1	1	64	<1	<0.015	<0.0075	4	1	0.06	16	64	0.5	4	S	0	0	0	0	0	0	0	0	0	0	0	0	0	0	0	0	0	0	0	0	0	0	0	0	0	0	0
2020-11-02	2020-11-03	11	W02	0	2	W2.1	2	4	1	1	256	<1	<0.015	0.015	<0.25	>16	0.06	4	32	16	16	S	0	0	0	0	0	0	0	0	0	0	0	0	0	0	0	0	0	0	0	0	0	0	0	0	0	0	0
2019-12-02	2/12/2019	12	W08	0	1	W8.1	2	11	1	1	128	<1	<0.015	<0.0075	<0.25	1	0.03	4	32	0.5	8	S	0	0	0	0	0	0	0	0	0	0	0	0	0	0	0	0	0	0	0	0	0	0	0	0	0	0	0
2019-10-01	2019-10-02	10	F01W	1	1	FW1.1	1	7	1	1	128	16	0.06	0.125	0.5	>16	0.5	4	>128	16	>16	S	0	1	1	0	0	0	0	0	0	0	1	0	0	1	0	0	0	0	0	0	0	0	0	0	1	0	0
2019-12-02	3/12/2019	12	F01W	1	0	FW1.1	1	8	1	1	128	16	0.006	0.125	0.5	>16	0.5	4	>128	16	>16	S	0	1	1	0	0	0	0	0	0	0	1	0	0	1	0	0	0	0	0	0	0	0	0	0	1	0	0
2020-01-29	2020-01-30	1	F01W	1	1	FW1.1	1	18	1	1	>256	<1	<0.015	<0.0075	0.5	1	0.03	4	8	0.5	2	S	0	0	0	0	0	0	0	0	0	0	0	0	0	0	0	0	0	0	0	0	0	0	0	0	0	0	0
2020-03-07	2020-03-07	3	F02W	1	2	FW2.1	1	20	1	1	64	<1	<0.015	<0.0075	<0.25	1	0.03	4	32	0.5	16	S	0	0	0	0	0	0	0	0	0	0	0	0	0	0	0	0	0	0	0	0	0	0	0	0	0	0	0
2020-03-07	2020-03-07	3	F03W	1	2	FW3.1	1	21	1	1	128	<1	<0.015	<0.0075	1	1	0.03	8	2	0.5	2	S	0	0	0	0	0	0	0	0	0	0	0	0	0	0	0	0	0	0	0	0	0	0	0	0	0	0	0
2020-03-07	2020-03-07	3	F04W	1	2	FW4.1	1	22	1	1	>256	4	<0.015	0.03	0.5	4	2	4	64	2	8	S	0	0	0	0	0	0	0	0	0	0	0	0	0	0	0	0	0	0	0	0	0	0	0	0	0	0	0
2020-01-29	2020-01-30	1	F04W	1	0	FW4.1	1	41	1	1	128	<1	<0.015	<0.0075	0.5	1	0.03	8	16	0.5	8	S	0	0	0	0	0	0	0	0	0	0	0	0	0	0	0	0	0	0	0	0	0	0	0	0	0	0	0
2019-10-01	2019-10-02	10	F04W	1	0	FW4.1	2	14	1	1	256	<1	<0.015	<0.0075	0.5	1	0.03	8	16	0.5	8	S	0	0	0	0	0	0	0	0	0	0	0	0	0	0	0	0	0	0	0	0	0	0	0	0	0	0	0
2019-12-02	3/12/2019	12	F02W	1	0	FW2.1	1	44	1	1	128	32	0.03	0.125	0.5	1	>2	8	>128	2	4	S	0	0	0	0	0	0	0	0	0	0	0	0	0	0	0	0	0	0	0	0	0	0	0	0	0	0	0
2019-12-02	3/12/2019	12	F03W	1	0	FW3.1	2	3	1	1	32	<1	0.06	0.125	<0.25	16	>2	4	32	16	1	S	0	0	0	0	1	0	0	0	0	0	0	0	0	0	0	0	0	0	0	0	0	0	0	0	0	0	0
[truncated: 8 more columns]

## Sheet: V. cholerae
Collected date	Pdate	Month	Code	Sample	Farm	Sample	lot	IDS	hly	OmpW	TcpA	CTX	Oxidase	Amp	Chloram	Cipro	Enro	Genta	OTC	Oxo	Strep	Sulfa	Tet	Tri	Florfenicol	TEM	Sul1	Sul2	Sul3	int1	int2	int3	CTX-M	qnrA	qnrB	qnrS	ermB	SHV	dfrA1	dfrA12	catA	catB	cmlA	strA	strB	tetD	adda1	tetA	tetB
2019-10-01	2019-10-01	10	W01	0	0	W1.1	VI	1	1	1	0	0	1	8	<1	0.03	0.0625	1	0.5	0.125	8	64	0.5	0.25	S	0	1	0	0	0	0	0	0	0	0	0	0	0	0	0	0	0	0	0	0	0	0	0	0
2019-10-01	2019-10-01	10	W05	0	0	W5.1	VI	3	1	1	0	0	1	8	<1	0.03	0.0625	1	0.5	0.125	8	64	0.5	0.25	S	0	1	0	0	0	0	0	0	0	0	0	0	0	0	0	0	0	0	0	0	0	0	0	0
2019-10-01	2019-10-01	10	W06	0	1	W6.1	VI	4	1	1	0	0	1	16	<1	0.03	0.125	1	0.5	0.125	8	64	0.5	0.25	S	0	1	0	0	0	0	0	0	0	0	0	0	0	0	0	0	0	0	0	0	0	0	0	0
2019-10-01	2019-10-01	10	W08	0	1	W8.1	VI	5	1	1	0	0	1	8	<1	0.03	0.0625	1	0.5	0.125	8	64	0.5	0.25	S	0	1	0	0	0	0	0	0	0	0	0	0	0	0	0	0	0	0	0	0	0	0	0	0
2019-10-01	2019-10-01	10	W11	0	2	W11.1	VI	6	1	1	0	0	1	8	<1	0.06	0.0625	1	0.5	0.125	8	64	0.5	0.25	S	0	1	0	0	0	0	0	0	0	0	0	0	0	0	0	0	0	0	0	0	0	0	0	0
2019-10-01	2019-10-01	10	W13	0	2	W13.1	VI	7	1	1	0	0	1	8	<1	0.03	0.0625	1	0.5	0.125	8	64	0.5	0.25	S	0	1	0	0	0	0	0	0	0	0	0	0	0	0	0	0	0	0	0	0	0	0	0	0
2019-10-01	2019-10-01	10	W14	0	2	W14.1	VIII	0	1	1	0	0	1	8	<1	0.03	0.0625	1	0.5	0.125	8	64	0.5	0.25	S	0	1	0	0	0	0	0	0	0	0	1	0	0	1	0	0	1	0	0	0	0	0	1	0
2019-10-01	2019-10-01	10	W15	0	2	W15.1	VIII	0	1	1	0	0	1	8	<1	0.03	0.0625	1	0.5	0.125	8	64	0.5	0.25	S	0	1	0	0	0	0	0	0	0	0	1	0	0	1	0	0	1	0	0	0	0	0	1	0
2019-10-01	2019-10-02	10	F09W	1	1	FW9.1	VIII	0	1	1	0	0	1	8	<1	0.03	0.0625	1	0.5	0.125	8	64	0.5	0.25	S	0	1	0	0	0	0	0	0	0	0	1	0	0	1	0	0	1	0	0	0	0	0	1	0
2019-10-01	2019-10-02	10	F12W	1	2	FW12.1	5	24	0	1	0	0	1	8	<1	0.03	0.125	1	0.5	0.25	8	<2	0.25	0.25	S	0	0	0	0	0	0	0	0	0	0	0	0	0	0	0	0	0	0	0	0	0	0	0	0
2019-10-01	2019-10-02	10	F12I	2	2	I12.1	VI	9	1	1	0	0	1	8	<1	0.03	0.0625	1	0.5	0.06	8	32	0.5	0.25	S	0	0	0	0	0	0	0	0	0	0	0	0	0	0	0	0	0	0	0	0	0	0	0	0
2019-10-01	2019-10-02	10	F12M	3	2	M12.1	5	23	0	1	0	0	1	8	<1	0.03	0.125	1	1	0.25	16	8	0.5	0.5	S	0	0	0	0	0	0	0	0	0	0	0	0	0	0	0	0	0	0	0	0	0	0	0	0
2019-12-02	2/12/2019	12	W01	0	0	W1.1	5	22	0	1	0	0	1	8	<1	0.03	0.125	1	1	0.25	8	8	0.5	0.5	S	0	0	0	0	0	0	0	0	0	0	0	0	0	0	0	0	0	0	0	0	0	0	0	0
2019-12-02	2/12/2019	12	W04	0	0	W4.1	5	18	0	1	0	0	1	8	<1	0.03	0.125	2	0.5	0.06	8	<2	0.25	0.5	S	0	0	0	0	0	0	0	0	0	0	0	0	0	0	0	0	0	0	0	0	0	0	0	0
2019-12-02	2/12/2019	12	W05	0	0	W5.1	5	27	0	1	0	0	1	8	<1	0.03	0.125	1	1	0.25	8	8	0.25	0.25	S	0	0	0	0	0	0	0	0	0	0	0	0	0	0	0	0	0	0	0	0	0	0	0	0
2019-12-02	2/12/2019	12	W06	0	1	W6.1	VI	2	1	1	0	0	1	8	<1	<0.015	<0.0075	0.5	<0.0625	<0.015	4	16	0.125	0.125	S	0	0	0	0	0	0	0	0	0	0	0	0	0	0	0	0	0	0	0	0	0	0	0	0
2019-12-02	2/12/2019	12	W07	0	1	W7.1	5	26	0	1	0	0	1	2	<1	0.03	<0.0075	1	1	0.06	8	8	0.5	0.25	S	0	0	0	0	0	0	0	0	0	0	0	0	0	0	0	0	0	0	0	0	0	0	0	0
2019-12-02	2/12/2019	12	W09	0	1	W9.1	5	25	0	1	0	0	1	8	<1	0.03	0.125	1	1	0.25	8	8	0.25	0.25	S	0	0	0	0	0	0	0	0	0	0	0	0	0	0	0	0	0	0	0	0	0	0	0	0
2019-12-02	2/12/2019	12	W10	0	1	W10.1	2	31	0	1	0	0	1	2	<1	<0.015	0.03	0.5	0.25	0.06	4	16	0.125	0.25	S	0	0	0	0	0	0	0	0	0	0	0	0	0	0	0	0	0	0	0	0	0	0	0	0
2019-12-02	2/12/2019	12	W13	0	2	W13.1	1	35	0	1	0	0	1	2	<1	<0.015	<0.0075	0.5	0.25	<0.015	4	32	0.125	<0.125	S	0	0	0	0	0	0	0	0	0	0	0	0	0	0	0	0	0	0	0	0	0	0	0	0
2019-12-02	3/12/2019	12	F12W	1	2	FW12.1	1	31	0	1	0	0	1	2	<1	<0.015	<0.0075	0.5	0.25	0.03	4	32	0.125	<0.125	S	0	0	0	0	0	0	0	0	0	0	0	0	0	0	0	0	0	0	0	0	0	0	0	0
2019-12-02	3/12/2019	12	F14W	1	2	FW14.1	1	29	0	1	0	0	1	8	<1	<0.015	0.03	0.5	0.25	0.03	4	32	<0.0625	<0.125	S	0	0	0	0	0	0	0	0	0	0	0	0	0	0	0	0	0	0	0	0	0	0	0	0
2019-12-02	3/12/2019	12	F05I	2	0	I5.1	2	39	1	1	0	0	1	2	<1	<0.015	0.06	<0.25	0.25	0.06	4	16	0.125	0.25	S	0	0	0	0	0	0	0	0	0	0	0	0	0	0	0	0	0	0	0	0	0	0	0	0
2019-12-02	3/12/2019	12	F07I	2	1	I7.1	2	38	1	1	0	0	1	2	<1	<0.015	<0.0075	<0.25	0.25	0.03	4	16	0.125	0.25	S	0	0	0	0	0	0	0	0	0	0	0	0	0	0	0	0	0	0	0	0	0	0	0	0
2019-12-02	3/12/2019	12	F11I	2	2	I11.1	3	38	0	1	0	0	1	<1	<0.015	<0.015	<0.0075	0.5	0.5	0.03	4	4	0.125	0.5	S	0	0	0	0	0	0	0	0	0	0	0	0	0	0	0	0	0	0	0	0	0	0	0	0
2019-12-02	3/12/2019	12	F12I	2	2	I12.1	3	41	0	1	0	0	1	<1	<0.015	<0.015	0.03	0.5	0.5	0.03	4	4	0.125	0.5	S	0	0	0	0	0	0	0	0	0	0	0	0	0	0	0	0	0	0	0	0	0	0	0	0
2019-12-02	3/12/2019	12	F02M	3	0	M2.1	3	32	0	1	0	0	1	<1	0.03	0.03	0.06	0.5	0.5	0.125	4	<2	0.125	0.5	S	0	0	0	0	0	0	0	0	0	0	0	0	0	0	0	0	0	0	0	0	0	0	0	0
2020-01-29	2020-01-29	1	W13	0	2	W13.1	3	23	0	1	0	0	1	<1	<0.015	<0.015	<0.0075	<0.25	0.5	0.03	4	<2	0.125	<0.125	S	0	0	0	0	0	0	0	0	0	0	0	0	0	0	0	0	0	0	0	0	0	0	0	0
2020-01-29	2020-01-29	1	W14	0	2	W14.1	4	20	0	1	0	0	1	4	<1	<0.015	0.06	0.5	0.5	0.25	8	16	0.125	1	S	0	0	0	0	0	0	0	0	0	0	0	0	0	0	0	0	0	0	0	0	0	0	0	0
2020-01-29	2020-01-29	1	W15	0	2	W15.1	3	17	0	1	0	0	1	<1	0.03	0.03	0.06	0.5	0.5	0.125	4	8	0.125	0.25	S	0	0	0	0	0	0	0	0	0	0	0	0	0	0	0	0	0	0	0	0	0	0	0	0
2020-01-29	2020-01-30	1	F03W	1	0	FW3.1	4	18	0	1	0	0	1	2	<1	<0.015	0.015	<0.25	0.5	0.06	4	4	0.125	0.25	S	0	0	0	0	0	0	0	0	0	0	0	0	0	0	0	0	0	0	0	0	0	0	0	0
2020-01-29	2020-01-30	1	F05W	1	0	FW5.1	3	7	0	1	0	0	1	<1	0.03	0.03	0.06	<0.25	0.25	0.125	4	4	0.125	0.25	S	0	0	0	0	0	0	0	0	0	0	0	0	0	0	0	0	0	0	0	0	0	0	0	0
2020-01-29	2020-01-30	1	F07W	1	0	FW7.1	2	35	0	1	0	0	1	2	<1	<0.015	<0.0075	0.5	0.25	<0.015	4	16	0.125	0.25	S	0	0	0	0	0	0	0	0	0	0	0	0	0	0	0	0	0	0	0	0	0	0	0	0
2020-01-29	2020-01-30	1	F10I	2	1	I10.1	1	27	0	1	0	0	1	4	<1	<0.015	0.06	0.5	0.25	0.06	4	32	0.125	<0.125	S	0	0	0	0	0	0	0	0	0	0	0	0	0	0	0	0	0	0	0	0	0	0	0	0
2020-01-29	2020-01-30	1	F14I	2	2	I14.1	1	23	0	1	0	0	1	4	<1	<0.015	0.06	0.5	0.25	0.06	4	32	<0.0625	<0.125	S	0	0	0	0	0	0	0	0	0	0	0	0	0	0	0	0	0	0	0	0	0	0	0	0
2020-01-29	2020-01-30	1	F15I	2	2	I15.1	1	20	1	1	0	0	1	2	<1	0.03	0.06	0.5	0.25	0.06	4	32	0.125	<0.125	S	0	0	0	0	0	0	0	0	0	0	0	0	0	0	0	0	0	0	0	0	0	0	0	0
2020-03-07	2020-03-07	3	W01	0	2	W1.1	5	30	0	1	0	0	1	8	<1	0.03	0.125	1	0.5	0.25	8	<2	0.25	0.5	S	0	0	0	0	0	0	0	0	0	0	0	0	0	0	0	0	0	0	0	0	0	0	0	0
2020-03-07	2020-03-07	3	W06	0	1	W6.1	1	19	1	1	0	0	1	2	<1	0.03	0.06	0.5	0.25	0.06	4	32	0.125	<0.125	S	0	0	0	0	0	0	0	0	0	0	0	0	0	0	0	0	0	0	0	0	0	0	0	0
2020-03-07	2020-03-07	3	W09	0	1	W9.1	1	1	0	1	0	0	1	4	<1	<0.015	<0.0075	0.5	0.125	<0.015	4	32	0.125	<0.125	S	0	0	0	0	0	0	0	0	0	0	0	0	0	0	0	0	0	0	0	0	0	0	0	0
2020-03-07	2020-03-08	3	F07W	1	1	FW7.1	5	34	0	1	0	0	1	8	<1	0.06	0.125	1	1	0.25	8	8	0.25	0.5	S	0	0	0	0	0	0	0	0	0	0	0	0	0	0	0	0	0	0	0	0	0	0	0	0
2020-03-07	2020-03-08	3	F10I	2	1	I10.1	4	16	0	1	0	0	1	4	<1	<0.015	<0.0075	0.5	0.5	0.03	8	16	0.125	0.5	S	0	0	0	0	0	0	0	0	0	0	0	0	0	0	0	0	0	0	0	0	0	0	0	0
2020-05-14	2020-05-14	5	W02	0	3	W2.1	1	6	0	1	0	0	1	2	<1	<0.015	<0.0075	<0.25	0.125	<0.015	4	32	0.125	<0.125	S	0	0	0	0	0	0	0	0	0	0	0	0	0	0	0	0	0	0	0	0	0	0	0	0
2020-05-14	2020-05-14	5	W05	0	3	W5.1	3	30	0	1	0	0	1	<1	0.03	0.03	0.06	0.5	0.5	0.125	4	<2	0.125	0.25	S	0	0	0	0	0	0	0	0	0	0	0	0	0	0	0	0	0	0	0	0	0	0	0	0
2020-05-14	2020-05-14	5	W06	0	2	W6.1	4	11	0	1	0	0	1	4	<1	<0.015	0.06	0.5	0.5	0.125	4	16	0.125	0.5	S	0	0	0	0	0	0	0	0	0	0	0	0	0	0	0	0	0	0	0	0	0	0	0	0
2020-05-14	2020-05-15	5	F07I	2	2	I7.1	3	21	0	1	0	0	1	<1	0.03	0.03	0.06	0.5	0.5	0.125	8	4	0.125	0.5	S	0	0	0	0	0	0	0	0	0	0	0	0	0	0	0	0	0	0	0	0	0	0	0	0
2020-05-14	2020-05-15	5	F08I	2	2	I8.1	3	16	0	1	0	0	1	<1	<0.015	<0.015	<0.0075	0.5	0.5	0.03	4	4	0.125	0.25	S	0	0	0	0	0	0	0	0	0	0	0	0	0	0	0	0	0	0	0	0	0	0	0	0
2020-07-11	2020-07-12	7	W15	0	0	W15.1	4	9	0	1	0	0	1	4	<1	<0.015	0.06	0.5	0.5	0.125	4	16	0.125	0.5	S	0	0	0	0	0	0	0	0	0	0	0	0	0	0	0	0	0	0	0	0	0	0	0	0
2020-07-11	2020-07-12	7	F10W	1	2	FW10.1	2	26	1	1	0	0	1	2	<1	<0.015	<0.0075	0.5	0.25	<0.015	4	16	0.125	0.25	S	0	0	0	0	0	0	0	0	0	0	0	0	0	0	0	0	0	0	0	0	0	0	0	0
2020-07-11	2020-07-12	7	F11W	1	0	FW11.1	2	23	1	1	0	0	1	4	<1	<0.015	<0.0075	0.5	0.25	<0.015	4	16	0.125	0.25	S	0	0	0	0	0	0	0	0	0	0	0	0	0	0	0	0	0	0	0	0	0	0	0	0
2020-07-11	2020-07-12	7	F02I	2	3	I2.1	VIII	16	1	1	0	0	1	8	<1	0.03	0.0625	1	0.25	0.06	4	32	0.25	0.125	S	0	0	0	0	0	0	0	0	0	0	0	0	0	0	0	0	0	0	0	0	0	0	0	0
2020-07-11	2020-07-12	7	F11I	2	0	I11.1	2	12	1	1	0	0	1	2	<1	0.03	0.06	0.5	0.25	0.06	4	16	0.125	0.25	S	0	0	0	0	0	0	0	0	0	0	0	0	0	0	0	0	0	0	0	0	0	0	0	0
2020-07-11	2020-07-12	7	F12I	2	0	I5.1	5	28	0	1	0	0	1	8	<1	0.03	0.125	1	1	0.25	8	8	0.25	0.5	S	0	0	0	0	0	0	0	0	0	0	0	0	0	0	0	0	0	0	0	0	0	0	0	0
2020-07-11	2020-07-12	7	F15I	2	0	I15.1	2	9	1	1	0	0	1	2	<1	<0.015	<0.0075	0.5	0.25	<0.015	4	16	0.125	<0.125	S	0	0	0	0	0	0	0	0	0	0	0	0	0	0	0	0	0	0	0	0	0	0	0	0
2020-07-11	2020-07-12	7	F01L	4	3	L1.1	5	37	0	1	0	0	1	8	<1	0.03	0.125	1	0.5	0.25	8	<2	0.25	0.25	S	0	0	0	0	0	0	0	0	0	0	0	0	0	0	0	0	0	0	0	0	0	0	0	0
2020-08-30	2020-08-31	8	W01	0	1	W1.1	2	4	1	1	0	0	1	2	<1	<0.015	<0.0075	<0.25	0.25	<0.015	4	16	0.125	<0.125	S	0	0	0	0	0	0	0	0	0	0	0	0	0	0	0	0	0	0	0	0	0	0	0	0
2020-08-30	2020-08-31	8	W03	0	1	W3.1	3	35	0	1	0	0	1	<1	<0.015	<0.015	<0.0075	0.5	0.5	0.03	4	4	0.25	0.5	S	0	0	0	0	0	0	0	0	0	0	0	0	0	0	0	0	0	0	0	0	0	0	0	0
2020-08-30	2020-08-31	8	W04	0	1	W4.1	4	7	0	1	0	0	1	4	<1	0.03	<0.0075	<0.25	0.5	0.03	4	8	0.125	0.5	S	0	0	0	0	0	0	0	0	0	0	0	0	0	0	0	0	0	0	0	0	0	0	0	0
2020-08-30	2020-08-31	8	W05	0	1	W5.1	3	26	0	1	0	0	1	<1	<0.015	<0.015	<0.0075	0.5	0.25	0.03	8	4	0.125	0.25	S	0	0	0	0	0	0	0	0	0	0	0	0	0	0	0	0	0	0	0	0	0	0	0	0
2020-08-30	2020-08-31	8	W09	0	4	W9.1	4	5	0	1	0	0	1	4	<1	0.03	0.06	0.5	0.25	0.25	8	16	0.125	1	S	0	0	0	0	0	0	0	0	0	0	0	0	0	0	0	0	0	0	0	0	0	0	0	0
2020-08-30	2020-08-31	8	W10	0	4	W10.1	3	14	0	1	0	0	1	<1	0.03	0.03	0.03	0.5	0.5	0.125	4	4	0.125	0.25	S	0	0	0	0	0	0	0	0	0	0	0	0	0	0	0	0	0	0	0	0	0	0	0	0
2020-08-30	2020-08-31	8	W15	0	0	W15.1	3	10	0	1	0	0	1	<1	0.03	0.03	0.03	0.5	0.5	0.125	4	8	0.125	0.25	S	0	0	0	0	0	0	0	0	0	0	0	0	0	0	0	0	0	0	0	0	0	0	0	0
2020-08-30	2020-08-31	8	F05I	2	1	I5.1	3	44	0	1	0	0	1	<1	<0.015	<0.015	0.03	0.5	0.5	0.03	8	<2	0.25	0.25	S	0	0	0	0	0	0	0	0	0	0	0	0	0	0	0	0	0	0	0	0	0	0	0	0
2020-08-30	2020-08-31	8	F06I	2	4	I6.1	3	11	0	1	0	0	1	<1	<0.015	<0.015	<0.0075	0.5	0.5	0.03	8	4	0.125	0.25	S	0	0	0	0	0	0	0	0	0	0	0	0	0	0	0	0	0	0	0	0	0	0	0	0
2020-08-30	2020-08-31	8	F08I	2	4	I8.1	3	42	0	1	0	0	1	<1	<0.015	<0.015	0.015	0.5	0.5	0.03	4	<2	0.125	0.25	S	0	0	0	0	0	0	0	0	0	0	0	0	0	0	0	0	0	0	0	0	0	0	0	0
2020-08-30	2020-08-31	8	F09I	2	4	I9.1	2	27	1	1	0	0	1	8	<1	<0.015	<0.0075	0.5	0.25	<0.015	4	16	0.125	0.25	S	0	0	0	0	0	0	0	0	0	0	0	0	0	0	0	0	0	0	0	0	0	0	0	0
2020-08-30	2020-08-31	8	F10I	2	4	I10.1	2	3	1	1	0	0	1	2	<1	<0.015	<0.0075	0.5	0.25	<0.015	4	16	0.125	0.25	S	0	0	0	0	0	0	0	0	0	0	0	0	0	0	0	0	0	0	0	0	0	0	0	0
2020-08-30	2020-08-31	8	F12I	2	0	I12.1	5	31	0	1	0	0	1	8	<1	0.06	0.125	1	1	0.25	8	8	0.25	0.25	S	0	0	0	0	0	0	0	0	0	0	0	0	0	0	0	0	0	0	0	0	0	0	0	0
2020-08-30	2020-08-31	8	F13I	2	0	I13.1	1	17	0	1	0	0	1	2	<1	<0.015	0.03	0.5	0.25	0.06	4	32	0.125	<0.125	S	0	0	0	0	0	0	0	0	0	0	0	0	0	0	0	0	0	0	0	0	0	0	0	0
2020-08-30	2020-08-31	8	F15I	2	0	I15.1	7	9	1	1	0	0	1	4	<1	<0.015	0.03	1	0.5	0.03	8	4	0.5	<0.125	S	0	0	0	0	0	0	0	0	0	0	0	0	0	0	0	0	0	0	0	0	0	0	0	0
2020-08-30	2020-08-31	8	F04L	4	1	L4.1	7	1	1	1	0	0	1	4	<1	<0.015	0.03	0.5	0.5	0.03	4	8	0.25	<0.125	S	0	0	0	0	0	0	0	0	0	0	0	0	0	0	0	0	0	0	0	0	0	0	0	0
2020-08-30	2020-08-31	8	F07L	4	4	L7.1	6	44	1	1	0	0	1	2	<1	0.03	0.06	1	0.5	<0.015	4	<2	0.25	<0.125	S	0	0	0	0	0	0	0	0	0	0	0	0	0	0	0	0	0	0	0	0	0	0	0	0
2020-08-30	2020-08-31	8	F09L	4	4	L9.1	6	43	1	1	0	0	1	2	<1	0.03	0.06	1	0.5	0.0625	8	16	0.25	<0.125	S	0	0	0	0	0	0	0	0	0	0	0	0	0	0	0	0	0	0	0	0	0	0	0	0
2020-08-30	2020-08-31	8	F10L	4	4	L10.1	6	35	1	1	0	0	1	2	<1	0.03	0.06	1	0.5	0.0625	8	16	0.25	<0.125	S	0	0	0	0	0	0	0	0	0	0	0	0	0	0	0	0	0	0	0	0	0	0	0	0
2020-08-30	2020-08-31	8	F15L	4	0	L15.1	6	3	1	1	0	0	1	0.25	<1	<0.015	<0.0075	<0.25	<0.0625	<0.015	8	<2	<0.0625	<0.125	S	0	0	0	0	0	0	0	0	0	0	0	0	0	0	0	0	0	0	0	0	0	0	0	0
2020-11-02	2020-11-03	11	W06	0	1	W6.1	6	1	1	1	0	0	1	4	<1	0.03	0.06	1	0.5	0.0625	8	16	0.25	<0.125	S	0	0	0	0	0	0	0	0	0	0	0	0	0	0	0	0	0	0	0	0	0	0	0	0
[truncated: 11 more columns]
