# Supplementary material for: Emergence of colistin resistance and characterization of antimicrobial resistance and virulence factors of Aeromonas hydrophila, Salmonella spp., and Vibrio cholerae isolated from hybrid red tilapia cage culture
Source: PeerJ. 2023 Feb 23;11:e14896. doi: 10.7717/peerj.14896 (PMC9968459; doi:10.7717/peerj.14896)
Supplement: Supplemental Information 2 [file peerj-11-14896-s002.xlsx]

## Sheet: Mutation location
DNA sequence							Sequence location
No	Sample Name	Collection date	Isolation source	Organisms	Serotypes	Genes	241	242	243	244	245	246	247	248	249	250	251	252	253	254	255
1	W11.1	2019-12-02	Cultivation water	Salmonella enterica	Neukoelln	gyrA	G	G	C	G	A	T	T	C	C	G	C	A	G	T	G
2	W11.3	2020-07-11	Cultivation water	Salmonella enterica	Chartes	gyrA	G	G	C	G	A	T	T	A	C	G	C	A	G	T	G
3	FW14.2	2019-12-02	Fish carcass rinse	Salmonella enterica	Saintpaul	gyrA	G	G	C	G	A	T	T	A	C	G	C	A	G	T	G
4	FW3.1	2020-11-02	Fish carcass rinse	Salmonella enterica	Virchow	gyrA	G	G	C	G	A	T	T	C	C	G	C	A	G	T	G
5	I5.2	2019-12-02	Intestine	Salmonella enterica	Saintpaul	gyrA	G	G	C	G	A	T	T	A	C	G	C	A	G	T	G
6	I13.1lotIX	2020-11-02	Intestine	Salmonella enterica	Saintpaul	gyrA	G	G	C	G	A	T	T	A	C	G	C	A	G	T	G
7	I13.1lotVIII	2020-08-30	Intestine	Salmonella enterica	Saintpaul	gyrA	G	G	C	G	A	T	T	A	C	G	C	A	G	T	G
8	I8.1	2020-11-02	Intestine	Salmonella enterica	Saintpaul	gyrA	G	G	C	G	A	T	T	A	C	G	C	A	G	T	G
Translated protein sequence							Protein location
No	Sample Name	Collection date	Isolation source	Organisms	Serotypes	Genes	81	82	83	84	85
1	W11.1	2019-12-02	Cultivation water	Salmonella enterica	Neukoelln	gyrA	Gly	Asp	Ser	Ala	Val
2	W11.3	2020-07-11	Cultivation water	Salmonella enterica	Chartes	gyrA	Gly	Asp	Ser	Ala	Val
3	FW14.2	2019-12-02	Fish carcass rinse	Salmonella enterica	Saintpaul	gyrA	Gly	Asp	Tyr	Ala	Val
4	FW3.1	2020-11-02	Fish carcass rinse	Salmonella enterica	Virchow	gyrA	Gly	Asp	Tyr	Ala	Val
5	I5.2	2019-12-02	Intestine	Salmonella enterica	Saintpaul	gyrA	Gly	Asp	Ser	Ala	Val
6	I13.1lotIX	2020-11-02	Intestine	Salmonella enterica	Saintpaul	gyrA	Gly	Asp	Tyr	Ala	Val
7	I13.1lotVIII	2020-08-30	Intestine	Salmonella enterica	Saintpaul	gyrA	Gly	Asp	Tyr	Ala	Val
8	I8.1	2020-11-02	Intestine	Salmonella enterica	Saintpaul	gyrA	Gly	Asp	Tyr	Ala	Val

## Sheet: all nucleotide sequences
DNA sequence							Sequence location
No	Sample Name	Collection date	Isolation source	Organisms	Serotypes	Genes	175	176	177	178	179	180	181	182	183	184	185	186	187	188	189	190	191	192	193	194	195	196	197	198	199	200	201	202	203	204	205	206	207	208	209	210	211	212	213	214	215	216	217
1	W11.1	2019-12-02	Cultivation water	Salmonella enterica	Neukoelln	gyrA	T	G	G	A	A	C	A	A	A	G	C	C	T	A	T	A	A	A	A	A	A	T	C	T	G	C	C	C	G	T	G	T	C	G	T	T	G	G	T	G	A	C	G
2	W11.3	2020-07-11	Cultivation water	Salmonella enterica	Chartes	gyrA	T	G	G	A	A	C	A	A	A	G	C	C	T	A	T	A	A	A	A	A	A	T	C	T	G	C	C	C	G	T	G	T	C	G	T	T	G	G	T	G	A	C	G
3	FW14.2	2019-12-02	Fish carcass rinse	Salmonella enterica	Saintpaul	gyrA	T	G	G	A	A	C	A	A	A	G	C	C	T	A	T	A	A	A	A	A	A	T	C	T	G	C	C	C	G	T	G	T	C	G	T	T	G	G	T	G	A	C	G
4	FW3.1	2020-11-02	Fish carcass rinse	Salmonella enterica	Virchow	gyrA	T	G	G	A	A	C	A	A	A	G	C	C	T	A	T	A	A	A	A	A	A	T	C	T	G	C	C	C	G	T	G	T	C	G	T	T	G	G	T	G	A	C	G
5	I5.2	2019-12-02	Intestine	Salmonella enterica	Saintpaul	gyrA	T	G	G	A	A	C	A	A	A	G	C	C	T	A	T	A	A	A	A	A	A	T	C	T	G	C	C	C	G	T	G	T	C	G	T	T	G	G	T	G	A	C	G
6	I13.1lotIX	2020-11-02	Intestine	Salmonella enterica	Saintpaul	gyrA	T	G	G	A	A	C	A	A	A	G	C	C	T	A	T	A	A	A	A	A	A	T	C	T	G	C	C	C	G	T	G	T	C	G	T	T	G	G	T	G	A	C	G
7	I13.1lotVIII	2020-08-30	Intestine	Salmonella enterica	Saintpaul	gyrA	T	G	G	A	A	C	A	A	A	G	C	C	T	A	T	A	A	A	A	A	A	T	C	T	G	C	C	C	G	T	G	T	C	G	T	T	G	G	T	G	A	C	G
8	I8.1	2020-11-02	Intestine	Salmonella enterica	Saintpaul	gyrA	T	G	G	A	A	C	A	A	A	G	C	C	T	A	T	A	A	A	A	A	A	T	C	T	G	C	C	C	G	T	G	T	C	G	T	T	G	G	T	G	A	C	G
[truncated: 265 more columns]
